# Supplementary material for: Mental health and psychosocial impact of the COVID-19 pandemic and social distancing measures among young adults in Bogotá, Colombia
Source: PubMed Central journal article supplement (PMC9807414; doi:10.3934/publichealth.2022044), 2022-09-01
Supplement: publichealth-09-04-044-s001.pdf [file publichealth-09-04-044-s001.pdf]

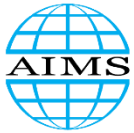

---

*Survey*

## **Mental health and psychosocial impact of the COVID-19 pandemic and social distancing measures among young adults in Bogotá, Colombia**

**José Miguel Uribe-Restrepo<sup>1,\*</sup>, Alan Waich-Cohen<sup>1</sup>, Laura Ospina-Pinillos<sup>1</sup>, Arturo Marroquín Rivera<sup>2</sup>, Sergio Castro-Díaz<sup>2</sup>, Juan Agustín Patiño-Trejos<sup>1</sup>, Martín Alonso Rondón Sepúlveda<sup>2</sup>, Karen Ariza-Salazar<sup>2</sup>, Luisa Fernanda Cardona-Porras<sup>1</sup>, Carlos Gómez-Restrepo<sup>1,2,3</sup> and Francisco Diez-Canseco<sup>4</sup>**

<sup>1</sup> Department of Psychiatry and Mental health, Pontificia Universidad Javeriana School of Medicine, Bogotá, Colombia

<sup>2</sup> Department of Clinical Epidemiology and Biostatistics, Pontificia Universidad Javeriana School of Medicine, Bogotá, Colombia

<sup>3</sup> Hospital Universitario San Ignacio, Bogotá, Colombia

<sup>4</sup> CRONICAS Center of Excellence in Chronic Diseases, Universidad Peruana Cayetano Heredia, Lima, Perú

\* **Correspondence:** Email: [laura.ospina@javeriana.edu.co](mailto:laura.ospina@javeriana.edu.co); Tel: +576013208320.

---

Diagram 1: Recruitment Consort

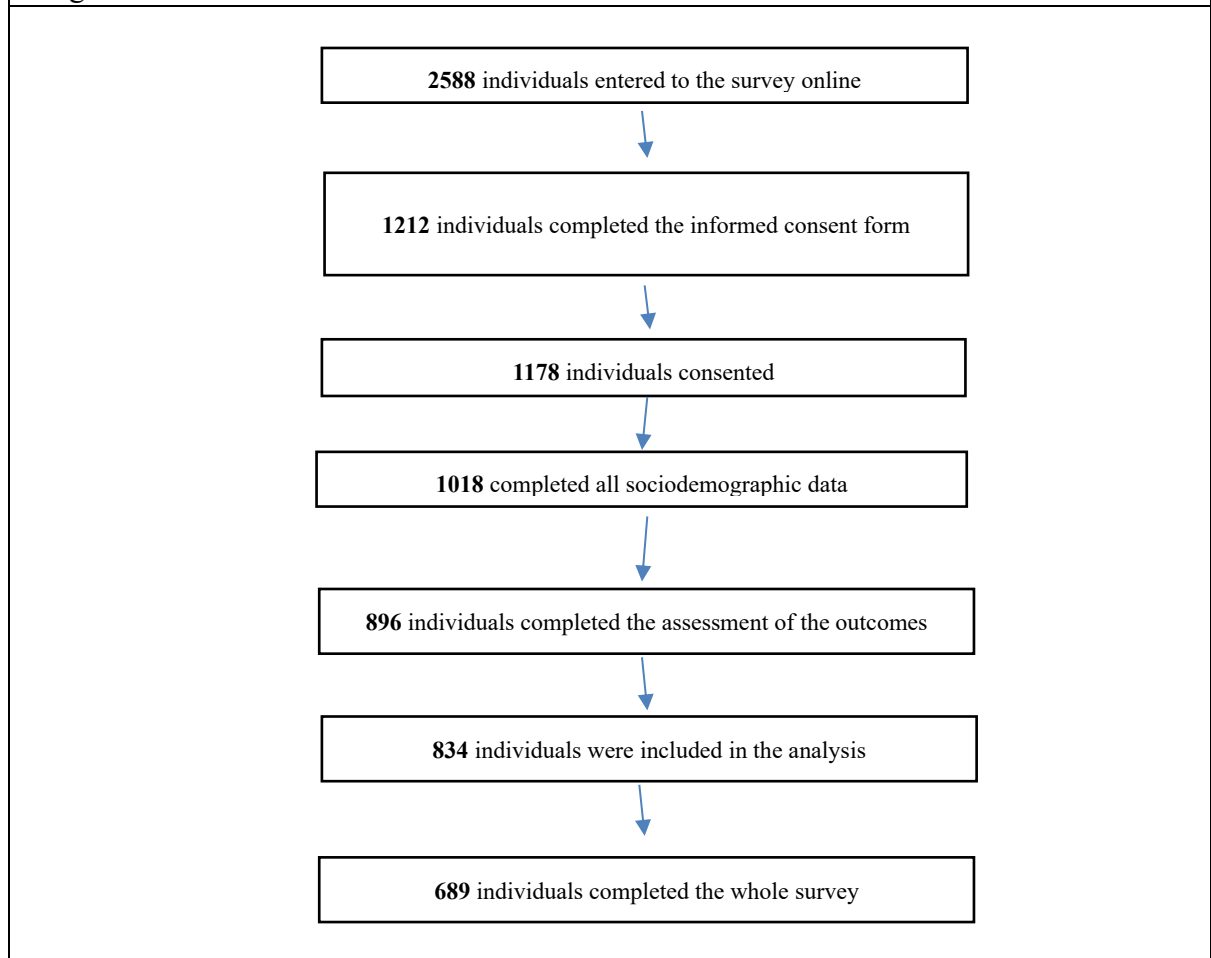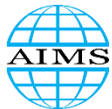

AIMS Press

© 2022 the Author(s), licensee AIMS Press. This is an open access article distributed under the terms of the Creative Commons Attribution License (<http://creativecommons.org/licenses/by/4.0>)
